# Supplementary material for: Efficient visible-light photocatalytic activity by band alignment in mesoporous ternary polyoxometalate–Ag2S–CdS semiconductors
Source: Royal Society of Chemistry journal article supplement (doi:10.1039/c4nr01094a), 2014-05-12
Supplement: c4nr01094a1.pdf [file c4nr01094a1.pdf]

## Supporting Information

# Efficient Visible-Light Photocatalytic Activity by Band Alignment in Mesoporous Ternary Polyoxometalate/Ag<sub>2</sub>S/CdS Semiconductors

Ioannis Kornarakis<sup>a</sup>, Ioannis N. Lykakis<sup>b</sup>, Nikolaos Vordos<sup>c</sup>, and Gerasimos S. Armatas<sup>a\*</sup>

<sup>a</sup>*Department of Materials Science and Technology and ‡Department of Chemistry, University of Crete, Heraklion 71003, Crete, Greece.*

<sup>b</sup>Department of Chemistry, Aristotle University of Thessaloniki, Thessaloniki 54124, Greece.

<sup>c</sup>Department of Electrical Engineering, Kavala Institute of Technology, 65404 Kavala, Greece.

\*E-mail: [garmatas@materials.uoc.gr](mailto:garmatas@materials.uoc.gr).

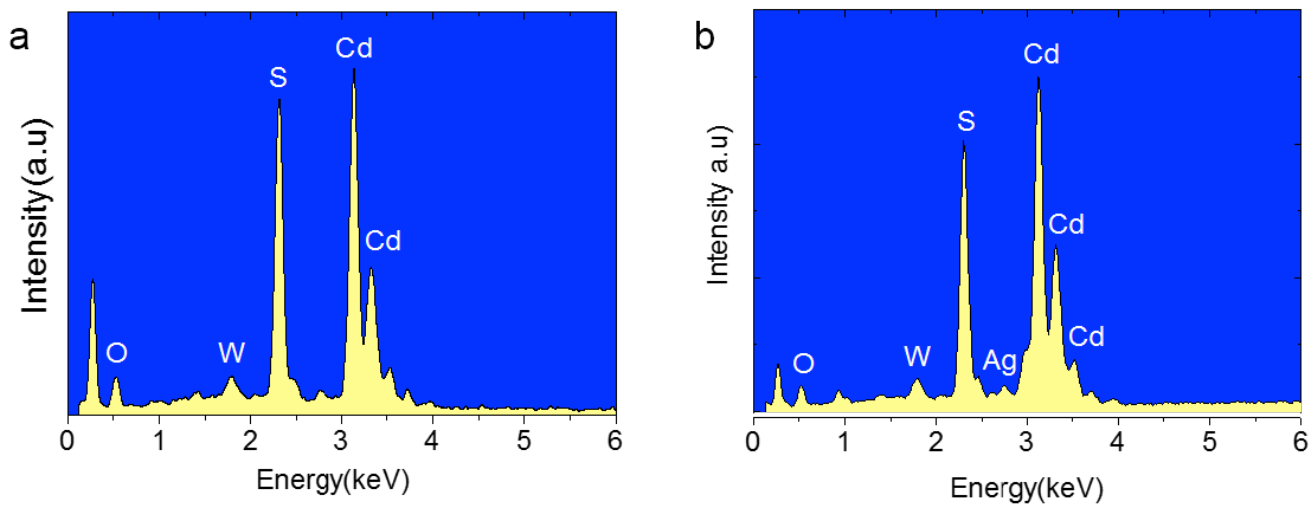

**Fig. S1** Typical EDS spectra of template-free mesoporous (a) STA/CdS and (b) STA/A<sub>2</sub>S/CdS hybrid materials. The EDS spectra show average atomic ratios of Cd/S/W ~48.7:49.8:1.5 for STA/CdS that correspond to a ~4.9 wt % H<sub>4</sub>SiW<sub>12</sub>O<sub>40</sub> (STA) loading and Cd/S/W/Ag ~47.6:47.9:1.5:3.0 for STA/A<sub>2</sub>S/CdS that correspond to a ~4.7 wt % H<sub>4</sub>SiW<sub>12</sub>O<sub>40</sub> and ~4.9 wt % Ag<sub>2</sub>S loading.

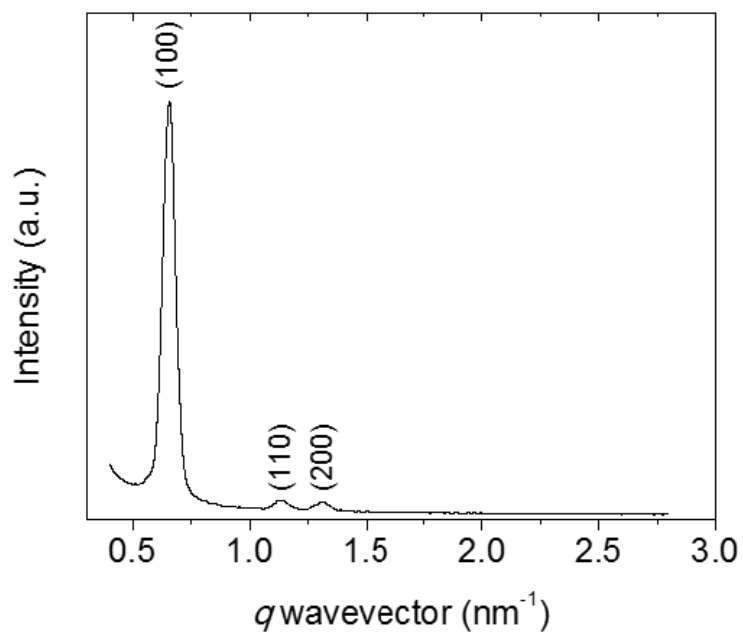

**Fig. S2** SAXS pattern of mesoporous SBA-15. The indexing of the Bragg diffractions is consisted with a hexagonal  $p6mm$  unit cell with lattice parameter  $a_0=11.0$  nm.

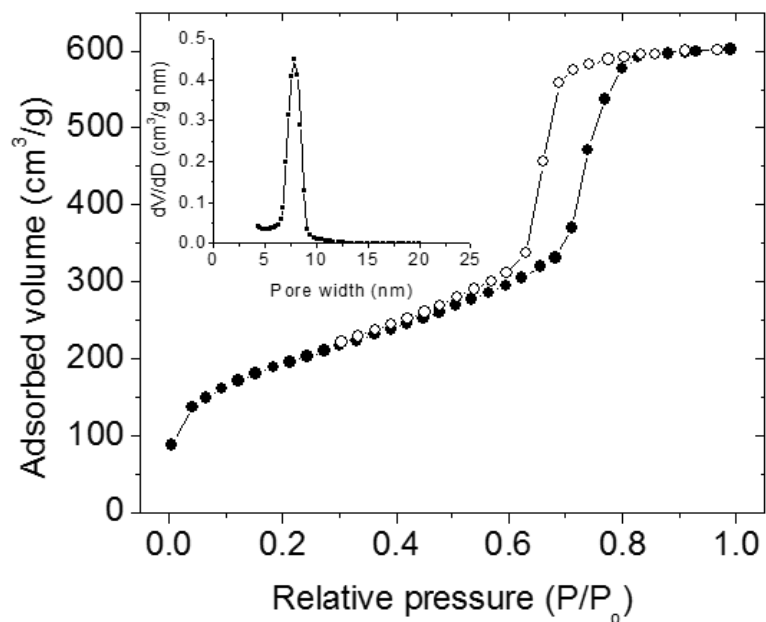

**Fig. S3** Nitrogen adsorption and desorption isotherms at  $-196\text{ }^{\circ}\text{C}$  of mesoporous SBA-15 silica. Analysis of the adsorption data with the BET method gives surface area of  $674\text{ m}^2\text{g}^{-1}$  and total pore volume of  $0.96\text{ cm}^3\text{g}^{-1}$ . (Inset) NLDFT pore size distribution calculated from the adsorption branch of isotherms. Given an estimation of the mesopore diameter ( $D_p$ ) at  $7.8\text{ nm}$  and the unit cell size ( $a_0$ ) at  $11.0\text{ nm}$ , the pore wall thickness (WT) is about  $3.2\text{ nm}$ , according to the equation  $\text{WT} = a_0 - D_p$ .

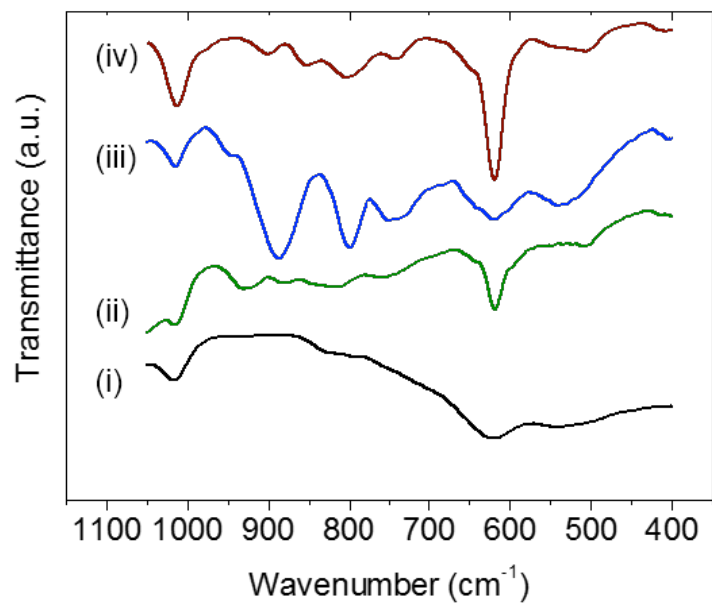

**Fig. S4** Infrared spectra of mesoporous (i) *meso*-CdS, (ii) PTA/Ag<sub>2</sub>/CdS, (iii) STA/Ag<sub>2</sub>/CdS and (iv) PMA/Ag<sub>2</sub>S/CdS materials.

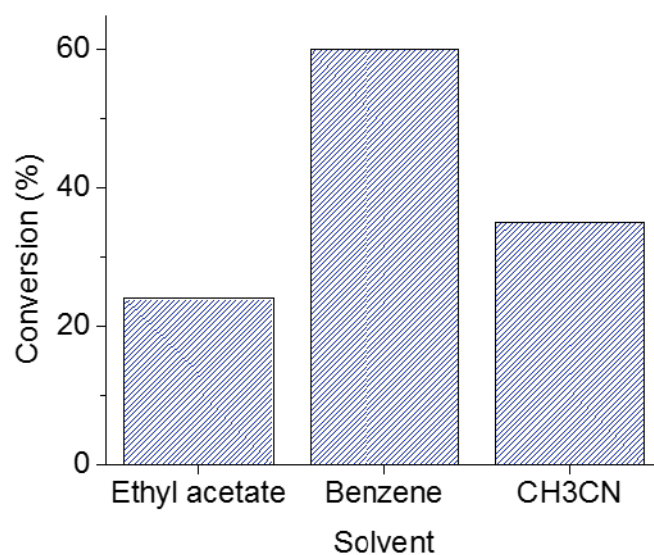

**Fig. S5** Control experiments using different solvents for the photooxidation of 1-phenylethanol over PTA/Ag<sub>2</sub>S/CdS photocatalyst. *Reaction conditions:* 0.1 mmol 1-phenylethanol, 15 mg catalyst, 1 mL/min O<sub>2</sub>, 1.5 mL solvent, 20 °C, visible-light irradiation ( $\lambda > 420$  nm), 1 h.

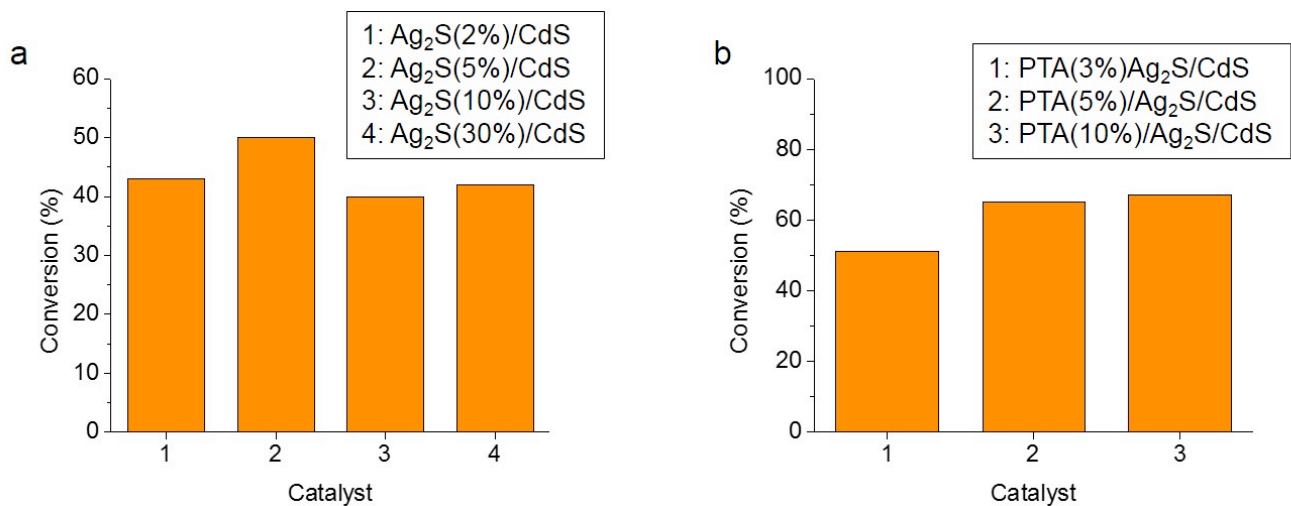

**Fig. S6** Control experiments for the photooxidation of 1-phenylethanol to acetophenone using different mesoporous hybrid Ag<sub>2</sub>S/CdS and PTA/Ag<sub>2</sub>S/CdS photocatalysts. *Reaction conditions:* 0.1 mmol 1-phenylethanol, 15 mg catalyst, 1 mL/min O<sub>2</sub>, 1.5 mL solvent, 20 °C, visible-light irradiation ( $\lambda > 420$  nm), 1 h.

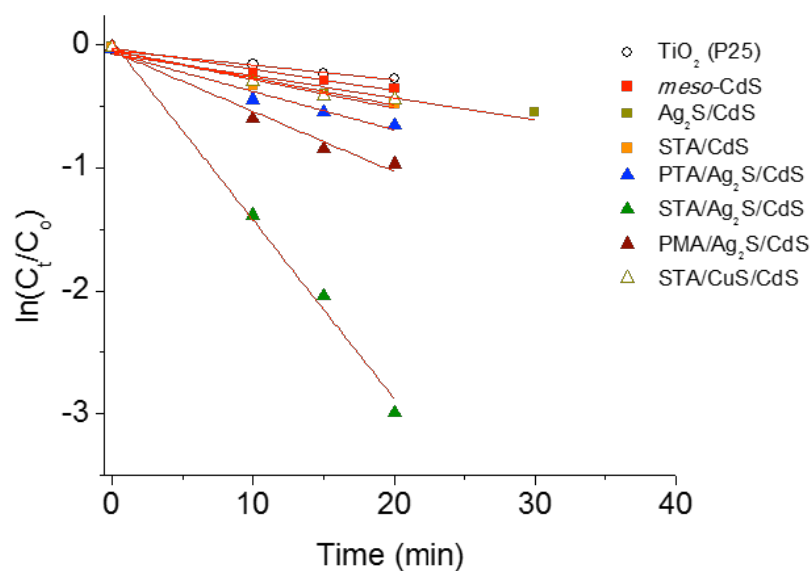

**Fig. S7** Kinetic profiles ( $C_0$ ,  $C_t$  are the initial and final (after time  $t$ ) molar concentrations of 1-phenylethanol, respectively) of photooxidation of 1-phenylethanol using various mesoporous CdS-based catalyst. The corresponding data of  $\text{TiO}_2$  Degussa (P25) nanoparticles are also given for comparison. The corresponding red lines are fit to the data.



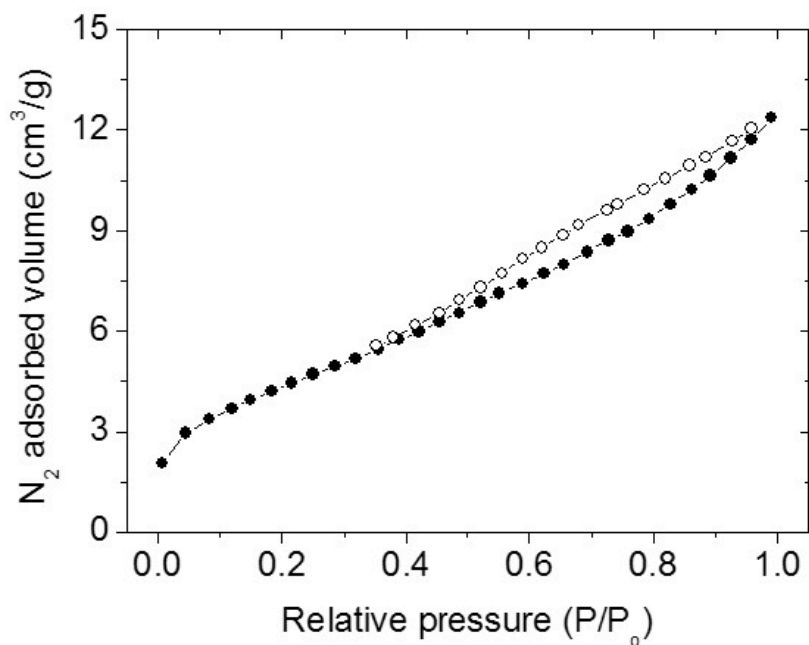

**Fig. S8** Nitrogen adsorption and desorption isotherms at -196 °C of *b*-STA/Ag<sub>2</sub>S/CdS composite material. Analysis of the adsorption data with the BET method gives surface area of 14 m<sup>2</sup>g<sup>-1</sup> and total pore volume of 0.02 cm<sup>3</sup>g<sup>-1</sup>.

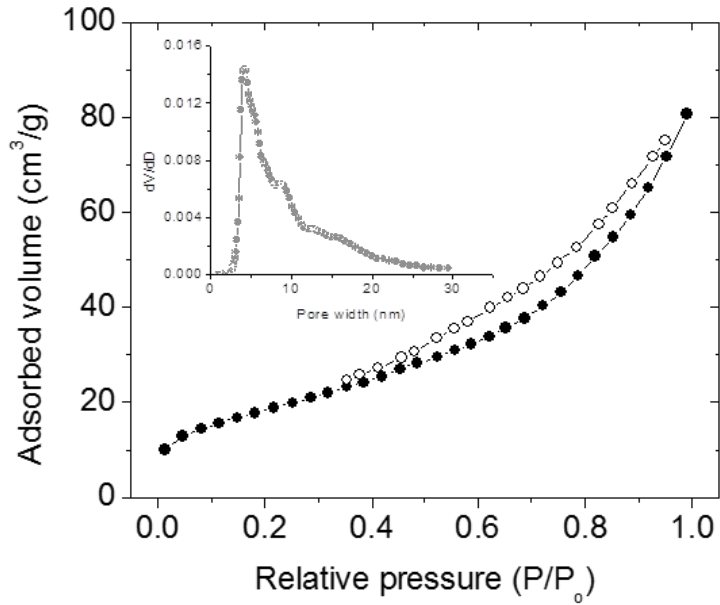

**Fig. S9** Nitrogen adsorption and desorption isotherms at  $-196\text{ }^{\circ}\text{C}$  of mesoporous STA/CuS/CdS ternary semiconductor. Analysis of the adsorption data with the BET method gives surface area of  $68\text{ m}^2\text{g}^{-1}$  and total pore volume of  $0.11\text{ cm}^3\text{g}^{-1}$ . (Inset) NLDFT pore size distribution calculated from the adsorption branch of isotherms, indicating pore diameter of  $\sim 4.3\text{ nm}$ .

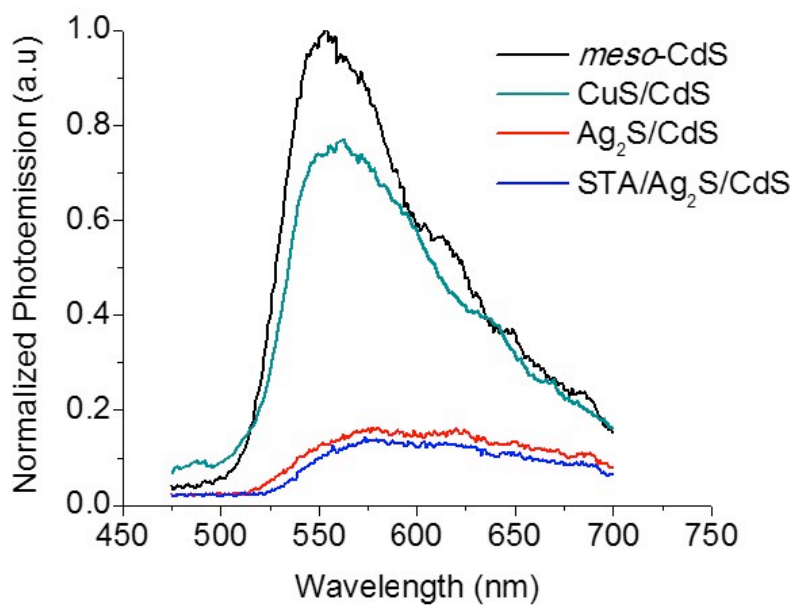

**Fig. S10** Normalized photoluminescence (PL) spectra for mesoporous CdS (*meso*-CdS), CuS/CdS, Ag<sub>2</sub>S/CdS and STA/Ag<sub>2</sub>S/CdS semiconductors (excitation: 380 nm).

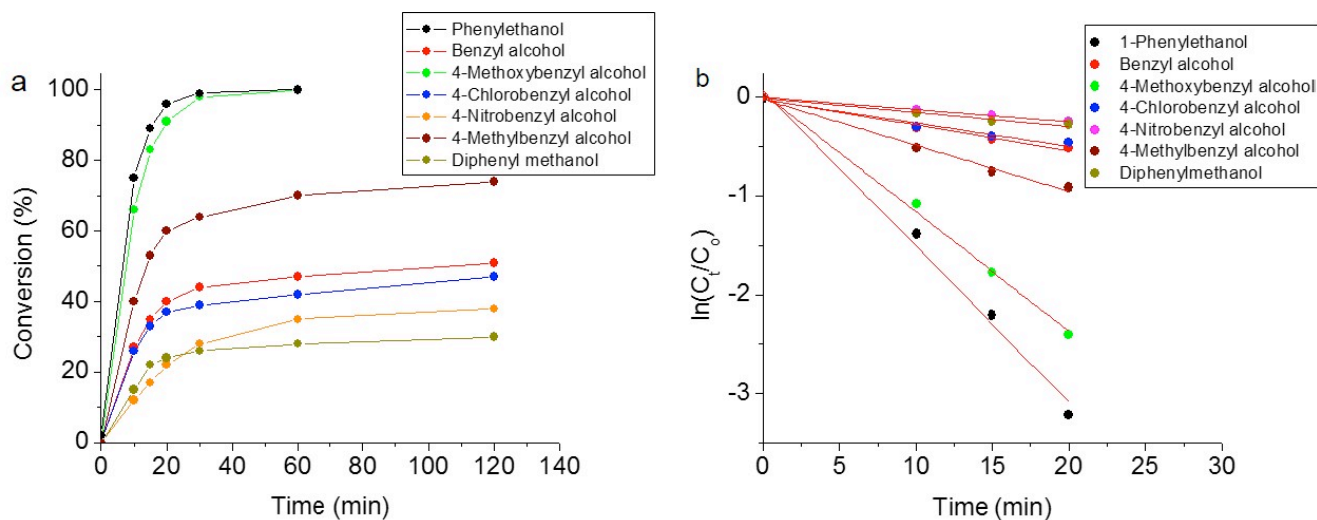

**Fig. S11** (a) Time evolution and (b) kinetic profiles ( $C_0$ ,  $C_t$  are the initial and final (after time  $t$ ) molar concentrations of substrate, respectively) of the photooxidation of various *para*-substituted benzyl alcohols catalyzed by mesoporous STA/Ag<sub>2</sub>S/CdS photocatalyst. In pane b: The corresponding red lines are fit to the data, indicating reaction rate constant ( $k$ ) of 0.148 min<sup>-1</sup> for phenylethanol, 0.026 min<sup>-1</sup> for benzyl alcohol, 0.121 min<sup>-1</sup> for 4-methoxybenzyl alcohol, 0.024 min<sup>-1</sup> for 4-chlorobenzyl alcohol, 0.012 min<sup>-1</sup> for 4-nitrobenzyl alcohol, 0.048 min<sup>-1</sup> for 4-methylbenzyl alcohol and 0.014 min<sup>-1</sup> for diphenylmethanol.

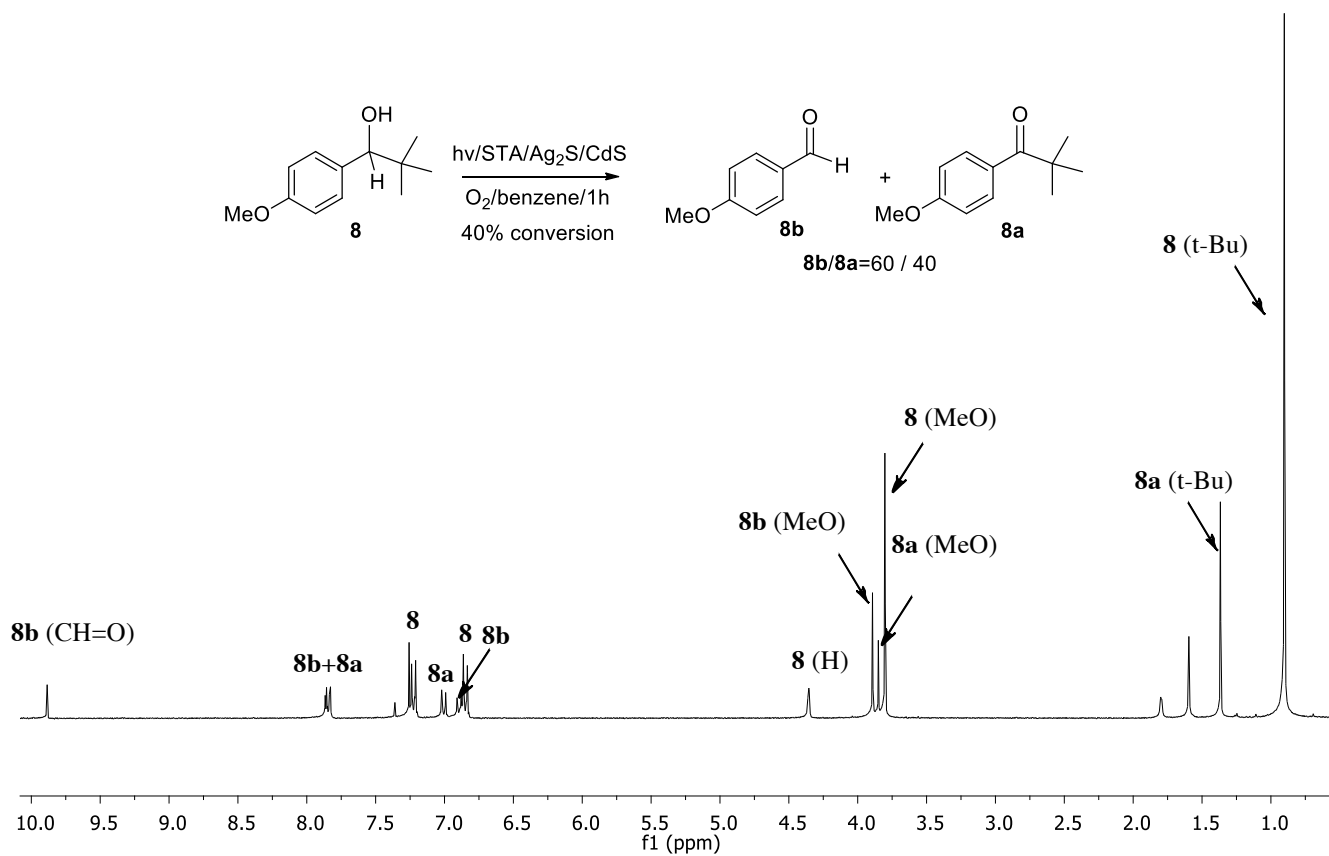

**Fig. S12**  $^1\text{H}$  NMR spectrum of the crude mixture of the oxidation of **8** in the presence of oxygen catalyzed by STA/ $\text{Ag}_2\text{S}$ /CdS after 1 h irradiation.

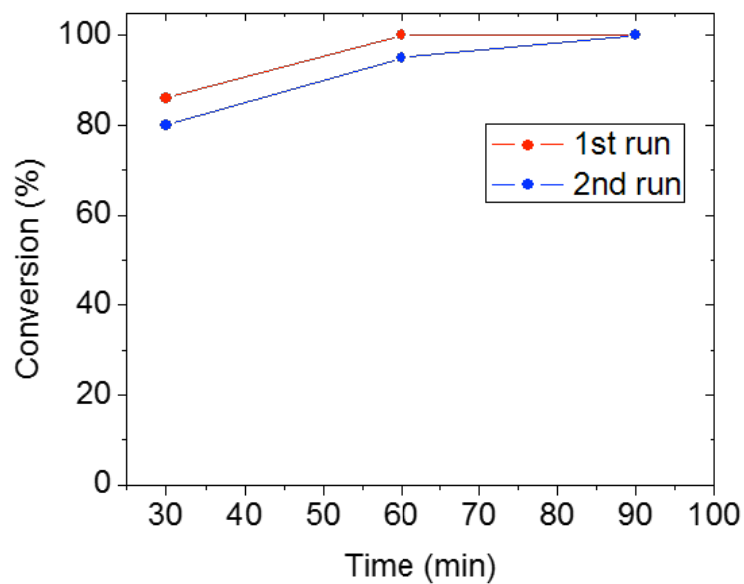

**Fig. S13** Recycling study of the mesoporous STA/Ag<sub>2</sub>S/CdS photocatalyst. *Reaction conditions:* 0.1 mmol 1-phenylethanol, 15 mg catalyst, 1 mL/min O<sub>2</sub>, 1.5 mL benzene, 20 °C, visible-light irradiation ( $\lambda > 420$  nm).

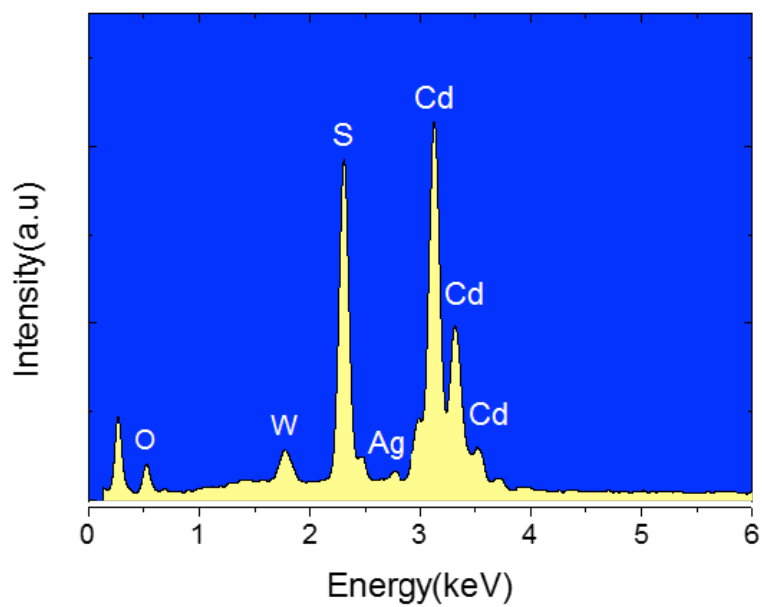

**Fig. S14** Typical EDS spectrum of recycled STA/A<sub>2</sub>S/CdS catalyst. The EDS spectrum shows average atomic ratios of Cd/S/W/Ag ~47.6:47.9:1.6:2.9 that correspond to a ~5 wt % H<sub>4</sub>SiW<sub>12</sub>O<sub>40</sub> and ~4.8 wt % Ag<sub>2</sub>S loading.

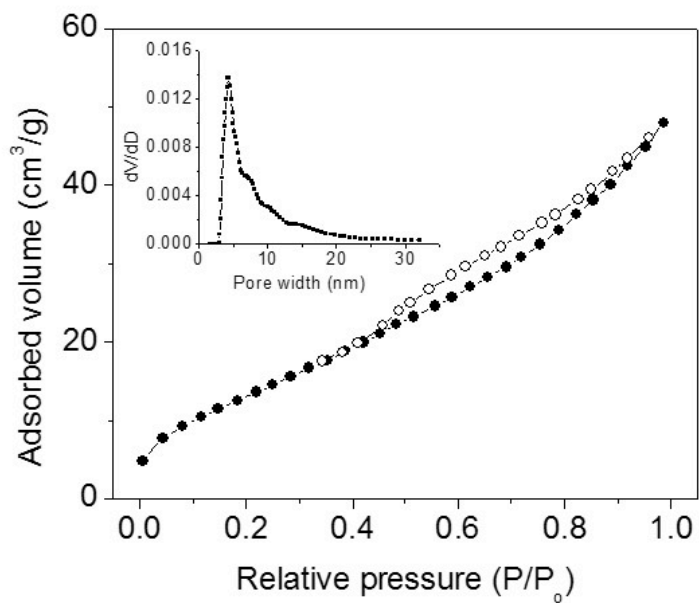

**Fig. S15** Nitrogen adsorption and desorption isotherms at -196 °C of recycled STA/Ag<sub>2</sub>S/CdS catalyst. Analysis of the adsorption data with the BET method gives surface area of 53 m<sup>2</sup>g<sup>-1</sup> and total pore volume of 0.09 cm<sup>3</sup>g<sup>-1</sup>. (Inset) NLDFFT pore size distribution calculated from the adsorption branch of isotherms, indicating pore diameter of ~4.4 nm.



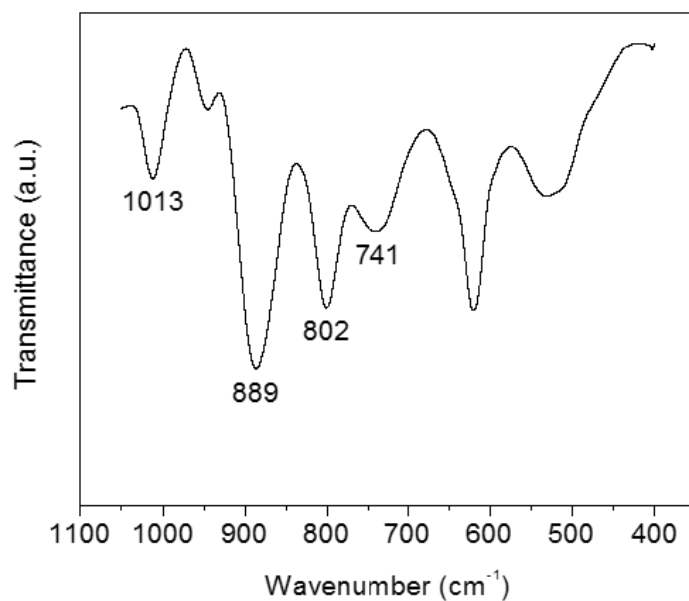

**Fig. S16** Infrared spectrum of the recycled STA/Ag<sub>2</sub>S/CdS catalyst. The strong absorption peaks at ~889, ~802 and 741 cm<sup>-1</sup> are assigned to the stretching vibration bands of W=O<sub>d</sub> terminal bonds and W-O<sub>b</sub>-W and W-O<sub>c</sub>-W bridging bonds between the corner-sharing and edge-sharing WO<sub>6</sub> octahedral of the [SiW<sub>12</sub>O<sub>40</sub>]<sup>4-</sup> cluster, respectively. The absorption at ~1013 cm<sup>-1</sup> can be assigned as Si-O<sub>a</sub> stretching vibrational bands of the SiO<sub>4</sub> central unit in [SiW<sub>12</sub>O<sub>40</sub>]<sup>4-</sup> Keggin cluster.
